# Supplementary material
Source: PubMed Central journal article supplement (PMC6886121)

# THE LANCET

## Supplementary appendix

This appendix formed part of the original submission and has been peer reviewed. We post it as supplied by the authors. **This online publication has been corrected. The corrected version first appeared at [thelancet.com](http://thelancet.com) on February 2, 2017.**

Supplement to: Rittmeyer A, Barlesi F, Waterkamp D, et al, for the OAK Study Group. Atezolizumab versus docetaxel in patients with previously treated non-small-cell lung cancer (OAK): a phase 3, open-label, multicentre randomised controlled trial. *Lancet* 2016; published online Dec 12. [http://dx.doi.org/10.1016/S0140-6736\(16\)32517-X](http://dx.doi.org/10.1016/S0140-6736(16)32517-X).

## Supplementary Appendix

This appendix has been provided by the authors to give readers additional information about their work.

### Contents

|                                   |         |
|-----------------------------------|---------|
| Collaborators                     | page 2  |
| Inclusion criteria                | page 5  |
| Exclusion criteria                | page 7  |
| Supplementary Table S1            | page 10 |
| Supplementary Table S2            | page 11 |
| Supplementary Table S3            | page 13 |
| Supplementary Table S4            | page 14 |
| Supplementary Table S5            | page 15 |
| Supplementary Table S6            | page 16 |
| Legend to Supplementary Figure S1 | page 17 |
| Supplementary Figure S1           | page 18 |
| Legend to Supplementary Figure S2 | page 21 |
| Supplementary Figure S2           | page 22 |

## The following investigators participated in the OAK study

**Argentina:** Luis Fein, Instituto de Oncología de Rosario; Alejo Lingua, Instituto Medico Rio Cuarto; Mirta Varela, Centro De Oncología E Investigación Buenos Aires (COIBA).

**Austria:** Richard Greil, Landeskrankenhaus Salzburg – Universitätsklinik Klinikum Salzburg, III. Medizinische Abt.; Ferdinand Haslbauer, Landeskrankenhaus Vöcklabruck, I. Abt. Für Innere Medizin; Georg Pall, Landeskrankenhaus Innsbruck - Universitätsklinik Klinikum Innsbruck - Tiroler Landeskrankenanstalten ges.M.B.H., Innere Medizin.

**Brazil:** Sergio Azevedo, Hospital das Clinicas - Federal University of Rio Grande do Sul (UFRGS).

**Canada:** Rasna Gupta, Windsor Regional Cancer Centre; Victor Cohen, McGill University, Sir Mortimer B Davis Jewish General Hospital; Reginald Comeau, Cite-de-la-Sante de Laval; Quincy Chu, Cross Cancer Institute.

**Chile:** Alejandro Andres Acevedo Gaete, Hospital Clinico Vina del Mar; Osvaldo Aren, Centro Internacional de Estudios Clinicos (CIEC); Eduardo Yanez, Instituto Clínico Oncológico del Sur.

**Finland:** Jussi Koivunen, Oulu University Hospital (Oncology); Paula Maasilta, Helsinki University Central Hospital (Department of Pulmonary Medicine); Jarkko Ahvonen, Tampere University Hospital (Department of Oncology).

**France:** Fabrice Barlesi, Hopital Nord, Service d'Oncologie Multidisciplinaire et Innovation Therapeutique; Christos Chouaid, Centre Hospitalier Intercommunal; Isabelle Monnet, Centre Hospitalier Intercommunal; Eric Dansin, Centre Oscar Lambret; Didier Debieuvre, Hopital Emile Muller; Chantal Decroisette Phan Van Ho, CH de La Region d'Annecy; Fabrice Denis, Centre Jean Bernard; Radj Gervais, Centre Francois Baclesse; Francois Goldwasser, Hopital Cochin; Francois Guichard, Polyclinique Bordeaux Nord Aquitaine; Werner Hilgers, Institut Sainte Catherine; Romain Corre, Hopital de Pontchaillou; Denis Moro-Sibilot, CHU Grenoble - Hopital Albert Michallon; Roland Schott, Centre Paul Strauss; Pierre-Jean Souquet, Centre Hospitalier Lyon Sud; Jean Tredaniel, GH Paris Saint Joseph; Virginie Westeel, Hopital Jean Minjoz; Damien Pouessel, Hopital Saint Louis; Henri Berard, Hia Sainte Anne; Jacques Cadranel, Hopital Tenon; Julien Mazieres, Hopital Larrey; Sylvie Friard, Hopital Foch; Marie Ange Massiani, Hopital Foch.

**Germany:** Wolfgang Schütte, Krankenhaus Martha-Maria Halle-Doelau gGmbH (Klinik fuer Innere Medizin II); Joachim von Pawel, Asklepios-Fachkliniken Muenchen-Gauting; Achim Rittmeyer, Fachklinik für Lungenerkrankungen, pneumologische Lehrklinik der Universitätsmedizin Goettingen; Christian Schulz, Universitätsklinikum Regensburg, Klinik und Poliklinik für Innere Medizin II; Heidrun Grosch, Thoraxklinik Heidelberg GmbH; Walburga Engel-Riedel, Krankenhaus Merheim Lungenklinik; Jens Kollmeier, Helios Klinikum Emil von Behring GmbH; Monika Serke, Lungenklinik Hemer; Akin Atmaca, Krankenhaus Nordwest; Klinik f. Onkologie und Hämatologie.

**Greece:** Konstantinos Syrigos, Uoa Sotiria Hospital; Haralabos Kalofonos, University Hospital of Patras; Georgios Fountzilias, Thermi Clinic.

**Guatemala:** Cesar Estuardo Hernandez-Monroy, Centro Oncológico Sixtino/Centro Oncológico SA.

**Hungary:** Gyorgy Losonczy, Semmelweis Egyetem, Pulmonologiai Klinika; Erzsebet Juhasz, Orszagos Koranyi Intezet; Veronika Sarosi, Pecs Tudományegyetem, I. sz. Belgyógyászati Klinika; Ákos Lantos, Torokbalinti Tudogyogyintezet, I. Osztaly.

**Italy:** Marcello Tiseo, Azienda Ospedaliera Univ Parma; Fortunato Ciardiello, Seconda Universita' Degli Studi; Diego Cortinovis, Azienda Ospedaliera S. Gerardo Di Monza; Filippo de Marinis, IRCCS Istituto Europeo Di Oncologia (IEO); Alessandro Follador, Azienda Ospedaliero-Uni Ria Di Udine; Luca Gianni, IRCCS Ospedale San Raffaele; Cesare Gridelli, Azienda Ospedaliera San Giuseppe Moscati; Francesco Grossi, Istituto Nazionale per la Ricerca sul Cancro di Genova; Giampaolo Tortora, A.O.U. Integrata Verona - Policlinico G.B. Rossi; Domenico Galetta, IRCCS Istituto Tumori Giovanni Paolo II; Alessandra Bearz, IRCCS Centro di Riferimento Oncologico (CRO); Carlo Barone, Uni Cattolica Policlinico Gemelli; Editta Baldini, Ospedale San Luca; Adolfo Favaretto, IRCCS Istituto Oncologico Veneto (IOV); Hector Soto Parra, Policlinico Rodolico; Antonio Chella, A.O. Universitaria Pisana-Ospedale Cisanello.

**Japan:** Makoto Maemondo, Miyagi Cancer Center; Atsushi Horiike, The Cancer Institute Hospital of JFCR; Hiroshi Nokihara, National Cancer Center Hospital; Shingo Matsumoto, National Cancer Center Hospital East; Norihiko Ikeda, Tokyo Medical University Hospital; Hiroshi Sakai, Saitama Cancer Center; Toshiaki Takahashi, Shizuoka Cancer Center; Toyooki Hida, Aichi Cancer Center Hospital; Kazuhiko Nakagawa, Kinki University Hospital; Shinji Atagi, National Hospital Organization Kinki-Chuo Chest Medical Center; Miyako Satouchi, Hyogo Cancer Center; Toshio Kubo, Okayama University Hospital; Kenichi Chikamori, National Hospital Organization, Yamaguchi - Ube Medical Center; Hiromoto Kitajima, National Hospital Organization Shikoku Cancer; Takashi Seto, National Hospital Organization Kyushu Cancer Center; Shiro Fujita, Institute of Biomedical Research and Innovation Hospital.

**Korea, Republic of:** Keunchil Park, Samsung Medical Center; Byoung Chul Cho, Yonsei University Severance Hospital (Medical Oncology); Ji-Youn Han, National Cancer Center; Jong-Seok Lee, Seoul National University

Bundang Hospital; Jin-Hyoung Kang, Seoul St. Mary's Hospital; Dong-Wan Kim, Seoul National University Hospital.

**The Netherlands:** B. Biesma, Jeroen Bosch Ziekenhuis; B.E.E.M. van den Borne, Catharina Ziekenhuis; G.J.M. Herder, Antonius Ziekenhuis.

**New Zealand:** Richard Sullivan, Auckland City Hospital; Archana Srivastava, Waikato Hospital; Blair McLaren, Dunedin Hospital.

**Norway:** Aslaug Helland, Oslo Universitetssykehus HF.

**Panama:** Erick Arauz, Centro Hemato Oncologico Paitilla.

**Poland:** Aleksandra Szczesna, Mazowieckie Centrum Leczenia Chorob Pluc i Gruzlicy; Dariusz Kowalski, Centrum Onkologii – Instytut im. Marii Skłodowskiej-Curie Klinika Nowotworów Piersi i Chirurgii Reko; Rafal Dziadziuszko, Medical University of Gdansk; Ewa Kalinka-Warzocha, Wojewodzki Szpital Specjalistyczny im. M. Kopernika; Rodryg Ramlau, Med Polonia Sp. z o.o. NSZOZ.

**Portugal:** Ana Rodrigues, IPO do Porto; Encarnação Teixeira, Hospital Pulido Valente; Fernando Barata, Hospital Geral.

**Russian Federation:** Nina Karaseva, City Clinical Oncology; Alexey Smolin, N. N. Burdenko Main Military Clinical Hospital; Mikhail Kopp, SBI of Healthcare Samara Regional Clinical Oncology Dispensary.

**Serbia:** Dragana Jovanovic, Clinical Center of Serbi; Branislav Perin, Institute for Pulmonary Diseases of Vojvodina.

**Spain:** Angel Artal Cortes, Hospital Universitario Miguel Servet; Pilar Garrido Lopez, Hospital Ramon y Cajal; Santiago Ponce Aix, Hospital Universitario 12 de Octubre; Javier De Castro Carpeno, Hospital Universitario La Paz; Mariano Provencio Pulla, Hospital Universitario Puerta de Hierro; Manuel Cobo Dols, Hospital Regional Universitario Carlos Haya; Manuel Domine Gomez, Fundacion Jimenez Diaz; Jose Luis Gonzalez Larriba, Hospital Universitario Clínico San Carlos; Delvys Rodriguez Abreu, Hospital Universitario Materno Infantil de Gran Canaria; M. Rosario Garcia Campelo, Complejo Hospitalario Universitario A Coruña (CHUAC).

**Sweden:** Reza Karimi, Karolinska Universitetssjukhuset, Solna; Anders Vikström, Universitetssjukhuset Linköping; Bengt Bergman, Sahlgrenska Universitetssjukhuset.

**Switzerland:** Oliver Gautschi, Luzerner Kantonsspital; Nicolas Mach, Hôpitaux Universitaires de Genève; Christine Waibel, Kantonsspital Baden.

**Taiwan:** Chong-Jen Yu, National Taiwan University Hospital; Han Pin Kuo, Chang Gung Medical Foundation - Linkou; Te-Chun Hsia, China Medical University Hospital; Yuh-Min Chen, Taipei Veterans General Hospital.

**Thailand:** Charuwan Akewanlop, Siriraj Hospital, Faculty of Medicine; Virote Sriuranpong, Chulalongkorn Hospital; Medical Oncology; Touch Ativitavas, Ramathibodi Hospital.

**Turkey:** Hande Yurna, Istanbul University Cerrahpasa Medical Faculty Hospital; Berna Komurcuoglu, Izmir Suat Seren Chest Diseases and Surgery Research Hospital.

**Ukraine:** Igor Bondarenko, State Medical Academy; Yevhen Hotko, Uzhgorod National University Central Municipal Hospital; Yuriy Vinnyk, Karkiv Regional Oncology Center.

**UK:** Conrad Lewanski, Charing Cross Hospital; Yvonne Summers, Christie Hospital NHS Trust; Ivo Hennig, Kings Mill Hospital; Tim Benepal, St George's Hospital; Ekaterini Boleti, Royal Free Hospital; Sunil Upadhyay, Diana Princess of Wales Hospital; James Spicer, Guys and St Thomas NHS Foundation Trust, Guys Hospital; Martin Forster, University College London Hospital.

**USA:** Shobha Chitneni, Hematology-Oncology Associates of the Quad Cities; Muhammad-Amjad Ali, Quincy Medical Group; Fadi Braiteh, Comprehensive Cancer Centers Of Nevada; Paul R. Conkling, Virginia Oncology Associates; Louis Fehrenbacher, Kaiser Permanente Vallejo Medical Center; Joseph Fiorillo, Willamette Valley Cancer Institute and Research Center; Shirish Gadgeel, Karmanos Cancer Institute; Hudson Webber; Cancer Research Building; David R Gandara, UC Davis Comprehensive Cancer Center; Fairouz Kabbinar, University of California Los Angeles; Humera Khurshid, Rhode Island Hospital; Eli Kirshner, The Valley Hospital, Luckow Pavillion, Office of Clinical Trials; Mark Kozloff, Ingalls Memorial Hospital; Michael Mullane, Aurora Health Care; Patient-Centered Research; Jeffrey Neidhart, San Juan Oncology Associates; Pamela Smith, Billings Clinic; Research Center; David Eduardo Kanamori, Comprehensive Blood & Cancer Center; Jonathan Polikoff, Kaiser Permanente San Marcos Medical Center; Andrea Rose, Northwest Medical Specialties; Rodolfo Bordoni, Georgia Cancer Specialists; David A. Smith, Northwest Cancer Specialists – Vancouver; Alexander I. Spira, Virginia Cancer Specialists, P.C.; Gary MacVicar, Illinois Cancer Care; Christian Thomas, New England Cancer Specialists; James Uyeki, Texas Oncology-Austin Central Cancer Center; Manish Patel, University of Minnesota; Scott Kono, Kaiser Permanente Franklin Medical Offices; Kaiser Permanente Lone Tree Medical Offices; Hongbin Chen, Roswell Park Cancer Institute.; Mark Knapp, Mid Ohio Oncology Hematology, Inc.; Joseph Leach, Metro-Minnesota Community Clinical Oncology Program; Raul Mena, East Valley Hematology & Oncology Medical Group; Gotardo Rodrigues, AMPM Research Clinic; Bijoy Telivala, Cancer Specialists of North Florida; Patrick Beatty, Montana Cancer Specialists; Jerome Goldschmidt-Jr; Oncology & Hematology Associates Southwest Virginia; Ralph Hauke, Oncology Hematology West Midwest; Donald Richards, Texas Oncology-Tyler Cancer Center; Charles

Weissman, New York Oncology Hematology, PC; Michael Kosty, Scripps Clinic; Eric Bernicker, The Methodist Cancer Center; Steven Papish, Morristown Medical Center, Hematology Oncology Associates; Robert Andrew Dichmann, Central Coast Medical Oncology; Brian Anthony DiCarlo, Central Coast Medical Oncology; Mark Robert Hancock, St. Mary's Hospital Regional Cancer Center; William Eyre Lawler, St. Jude Heritage Healthcare, Virginia K. Crosson Cancer Center; Thomas Eugene Lowe, Torrance Memorial Physician Network Cancer Care Associates; Ritwick Panicker, Cancer Treatment Centers of America-Tulsa; James Delfino Sanchez, Comprehensive Cancer Centers of Nevada; Nerses Simon Tchekmedyan, Pacific Shores Medical Group; David Dae-Young Kim, North Valley Hematology Oncology Medical Group, Thomas & Dorothy Leavey Cancer Center; Tirrell Tremayne Johnson, Orlando Health Inc.

## Inclusion criteria

Patients must meet all of the following criteria to be eligible for study entry:

- Signed informed consent form
- Ability to comply with protocol
- Aged 18 years or older
- Histologically or cytologically documented non-small-cell lung cancer (NSCLC) that is currently locally advanced or metastatic (ie, stage IIIB not eligible for definitive chemoradiotherapy, stage IV or recurrent) NSCLC (per the UICC/AJCC staging system, 7<sup>th</sup> edition); pathological characterisation may be from tumour specimens collected at a time when the NSCLC was at an earlier stage but must be sufficient to define patients as having either squamous or non-squamous histology
- Representative formalin-fixed paraffin-embedded (FFPE) tumour specimens in paraffin blocks (preferred) or at least 15 unstained slides, with an associated pathology report, for central testing and determined to be evaluable for tumour programmed death-ligand 1 (PD-L1) expression prior to study enrolment; patients with fewer than 15 unstained slides available at baseline (but no fewer than ten) may be eligible following discussion with the Medical Monitor
  - Tumour tissue should be of good quality based on total and viable tumour content. Fine-needle aspiration, brushing, cell pellet from pleural effusion, and lavage samples are not acceptable. For core needle biopsy specimens, at least three cores should be submitted for evaluation
  - Patients who do not have tissue specimens meeting eligibility requirements may undergo a biopsy during the screening period. Acceptable samples include core needle biopsies for deep tumour tissue (minimum three cores) or excisional, incisional, punch or forceps biopsies for cutaneous, subcutaneous or mucosal lesions
  - Tumour tissue from bone metastases is not evaluable for tumour PD-L1 expression; therefore, it is not acceptable
  - Patients having additional tissue samples from procedures performed at different times during the course of their NSCLC will be requested (but not required) to also submit these samples for central testing. Tissue samples obtained at multiple times for individual patients will greatly contribute to an improved understanding of the dynamics of PD-L1 expression and relationship with intervening anti-cancer therapy
- Disease progression during or following treatment with a prior platinum-containing regimen for locally advanced, unresectable/inoperable or metastatic NSCLC or disease recurrence within 6 months of treatment with a platinum-based adjuvant/neoadjuvant regimen or combined modality (eg, chemoradiation) regimen with curative intent
  - Adjuvant/neoadjuvant chemotherapy or chemoradiation counts as a prior chemotherapy regimen if < 6 months have elapsed between the last dose and the date of recurrence. Combined treatment with chemotherapy and radiation constitutes a single regimen; surgery is not considered a regimen
  - Patients may have received one additional cytotoxic chemotherapy regimen (maximum of two prior cytotoxic chemotherapy regimens)
  - Chemotherapy regimens will be counted based on interval disease progression and not the number of agents or switches in agents (eg, a first-line therapy that consists of several cycles of a platinum doublet and subsequent maintenance therapy that introduces or switches to a new chemotherapy agent without interval disease progression will all be considered one chemotherapy regimen)
  - Patients with advanced lung cancer and a sensitising *EGFR* mutation will additionally be required to have experienced disease progression (during or after treatment) with an EGFR tyrosine kinase inhibitor (TKI; erlotinib, gefitinib, etc)
  - Patients with unknown *EGFR* mutational status not previously treated with an EGFR TKI but whose tumour may harbour a sensitizing *EGFR* mutation (ie, non-squamous histology, *KRAS* status wild-type or unknown, *ALK* fusion oncogene negative or unknown) will be tested by a central laboratory prior to enrolment
  - Patients with a previously detected *ALK* fusion oncogene must additionally have experienced disease progression (during or after treatment) with crizotinib or another ALK inhibitor
  - The last dose of prior systemic anti-cancer therapy must have been administered  $\geq 21$  days prior to randomisation, with the exception being TKIs approved for treatment of NSCLC have to be discontinued  $\geq 7$  days prior to Cycle 1, Day 1

- The baseline scan must be obtained after discontinuation of prior TKIs (washout not required prior to obtaining the scan)
- The last dose of treatment with any investigational agent or participation in another interventional study must have ended  $\geq 28$  days prior to randomisation
- Anti-cancer agents used for pleurodesis are not counted as a line of therapy
- Prior radiation therapy is allowed provided the patient has recovered from any toxic effects thereof
- Measurable disease per Response Evaluation Criteria in Solid Tumors (RECIST; version 1.1)
- Eastern Cooperative Oncology Group (ECOG) performance status of 0 or 1
- Life expectancy  $\geq 12$  weeks
- Adequate hematologic and end-organ function, defined by the following laboratory results obtained within 14 days prior to the first study treatment:
  - ANC  $\geq 1500$  cells/ $\mu\text{L}$  (without granulocyte colony-stimulating factor support within 2 weeks of laboratory test used to determine eligibility)
  - White blood cell counts  $> 2500/\mu\text{L}$
  - Lymphocyte count  $\geq 500/\mu\text{L}$
  - Serum albumin  $\geq 2.5$  g/dL
  - Platelet count  $\geq 100,000/\mu\text{L}$  (without transfusion within 2 weeks of laboratory test used to determine eligibility)
  - Haemoglobin  $\geq 9.0$  g/dL
  - Patients may be transfused or receive erythropoietic treatment to meet this criterion
  - Liver function tests meeting one of the following criteria:
    - Aspartate aminotransferase (AST) and alanine transaminase (ALT)  $\leq 2.5$  times the upper limit of normal (ULN), with alkaline phosphatase  $\leq 2.5 \times \text{ULN}$  or
    - AST and ALT  $\leq 1.5 \times \text{ULN}$ , with alkaline phosphatase  $> 2.5 \times \text{ULN}$
  - Serum bilirubin  $\leq 1.0 \times \text{ULN}$
  - Patients with known Gilbert's disease who have serum bilirubin level  $\leq 3 \times \text{ULN}$  may be enrolled
  - International normalised ratio and activated partial thromboplastin time  $\leq 1.5 \times \text{ULN}$
  - This applies only to patients who are not receiving therapeutic anticoagulation; patients receiving therapeutic anticoagulation should be on a stable dose for at least 1 week prior to randomisation
  - Creatinine clearance  $\geq 30$  mL/min
    - Cockcroft-Gault, Chronic Kidney Disease Epidemiology Collaboration (CKD-EPI), or Modification of Diet in Renal Disease (MDRD) formulas may be used for creatinine clearance calculation. Note that 24-hour urine collection is not required but is allowed
- For female patients of childbearing potential and male patients with partners of childbearing potential, agreement (by patient and/or partner) to use highly effective form(s) of contraception (ie, one that results in a low failure rate [ $< 1\%$  per year] when used consistently and correctly) and to continue its use for 6 months after the last dose of atezolizumab
- Patients must have recovered (ie, improvement to Grade 1 or better) from all acute toxicities from previous therapy, excluding alopecia

## Exclusion criteria

Patients who meet any of the following criteria will be excluded from study entry:

### Cancer-specific exclusions

- Active or untreated central nervous system (CNS) metastases as determined by computerised tomography (CT) or magnetic resonance imaging evaluation during screening and prior radiographic assessments
  - Patients with a history of *treated asymptomatic* supratentorial CNS metastases are eligible, provided they meet all of the following criteria:
    - Measurable disease outside the CNS
    - Only supratentorial metastases allowed (ie, no metastases to midbrain, pons, cerebellum, medulla or spinal cord)
    - No history of intracranial haemorrhage
    - No ongoing requirement for corticosteroids as therapy for CNS disease; anticonvulsants at a stable dose allowed
    - No stereotactic radiation within 7 days or whole-brain radiation within 14 days prior to Cycle 1, Day 1
    - No evidence of interim progression between the completion of CNS-directed therapy and the screening radiographic study
    - Note: Patients with new asymptomatic CNS metastases detected at the screening scan must receive radiation therapy and/or surgery for CNS metastases. Following treatment, these patients may then be eligible without the need for an additional brain scan prior to enrolment, if all other criteria are met
- Spinal cord compression not definitively treated with surgery and/or radiation or previously diagnosed and treated spinal cord compression without evidence that disease has been clinically stable for  $\geq 2$  weeks prior to randomisation
- Leptomeningeal disease
- Uncontrolled pleural effusion, pericardial effusion, or ascites requiring recurrent drainage procedures
- Uncontrolled tumour-related pain
  - Patients requiring pain medication must be on a stable regimen at study entry
  - Symptomatic lesions amenable to palliative radiotherapy (eg, bone metastases or metastases causing nerve impingement) should be treated prior to enrolment
  - Asymptomatic metastatic lesions whose further growth would likely cause functional deficits or intractable pain (eg, epidural metastasis that is not presently associated with spinal cord compression) should be considered for loco-regional therapy if appropriate prior to enrolment
- Uncontrolled hypercalcaemia ( $> 1.5$  mmol/L ionised calcium or calcium  $> 12$  mg/dL or corrected serum calcium  $> \text{ULN}$ ) or symptomatic hypercalcaemia requiring continued use of bisphosphonate therapy or denosumab
  - Patients who are receiving bisphosphonate therapy or denosumab specifically to prevent skeletal events and who do not have a history of clinically significant hypercalcaemia are eligible
  - Patients who are receiving denosumab prior to enrolment must be willing and eligible to discontinue its use and replace it with a bisphosphonate instead while in the study
- Malignancies other than NSCLC within 5 years prior to randomisation, with the exception of those with a negligible risk of metastasis or death and treated with expected curative outcome (such as adequately treated carcinoma in situ of the cervix, basal or squamous cell skin cancer, localised prostate cancer treated with curative intent or ductal carcinoma in situ treated surgically with curative intent)

### General medical exclusions

- Pregnant and lactating women
- Evidence of significant uncontrolled concomitant disease that could affect compliance with the protocol or interpretation of results, including significant liver disease (such as cirrhosis, uncontrolled major seizure disorder or superior vena cava syndrome)
- Significant cardiovascular disease, such as New York Heart Association cardiac disease (Class II or greater), myocardial infarction within 3 months prior to randomisation, unstable arrhythmias or unstable angina



- Patients with a known left ventricular ejection fraction (LVEF) < 40% will be excluded
- Patients with known coronary artery disease, congestive heart failure not meeting the above criteria, or LVEF < 50% must be on a stable medical regimen that is optimised in the opinion of the treating physician, in consultation with a cardiologist if appropriate
- Severe infections within 4 weeks prior to randomisation including but not limited to hospitalisation for complications of infection, bacteraemia or severe pneumonia
- Received therapeutic oral or intravenous antibiotics within 2 weeks prior to randomisation
  - Patients receiving prophylactic antibiotics (eg, for prevention of a urinary tract infection or chronic obstructive pulmonary disease) are eligible
- Major surgical procedure within 4 weeks prior to randomisation or anticipation of need for a major surgical procedure during the course of the study other than for diagnosis
- Inability to understand the local language(s) for which the EORTC QLQ-C30 and QLQ-LC13 questionnaires are available

#### **Exclusion criteria related to docetaxel**

- Prior treatment with docetaxel
- History of severe hypersensitivity to docetaxel or to other drugs formulated with polysorbate 80
- Grade  $\geq 2$  peripheral neuropathy as defined by NCI CTCAE v4.0 criteria
- Inability to discontinue use of strong cytochrome P450 (CYP)3A4 inhibitors including but not limited to ketoconazole, itraconazole, clarithromycin, atazanavir, indinavir, nefazodone, nelfinavir, ritonavir, saquinavir, telithromycin or voriconazole

#### **Exclusion criteria related to atezolizumab**

- History of severe allergic, anaphylactic or other hypersensitivity reactions to chimeric or humanised antibodies or fusion proteins
- Known hypersensitivity or allergy to biopharmaceuticals produced in Chinese hamster ovary cell products or any component of the atezolizumab formulation
- History of autoimmune disease including but not limited to myasthenia gravis, myositis, autoimmune hepatitis, systemic lupus erythematosus, rheumatoid arthritis, inflammatory bowel disease, vascular thrombosis associated with antiphospholipid syndrome, Wegener's granulomatosis, Sjögren's syndrome, Guillain-Barré syndrome, multiple sclerosis, vasculitis or glomerulonephritis
  - Patients with a history of autoimmune-related hypothyroidism on a stable dose of thyroid replacement hormone may be eligible for this study
  - Patients with controlled Type 1 diabetes mellitus on a stable insulin regimen may be eligible for this study
- Patients with prior allogeneic bone marrow transplantation or prior solid organ transplantation
- Known tumour PD-L1 expression status from other clinical trials (eg, patients whose PD-L1 expression status was determined during screening for entry into a trial with anti-PD-1 or anti-PD-L1 antibodies but were not eligible are excluded)
- History of idiopathic pulmonary fibrosis (including pneumonitis), drug-induced pneumonitis, organizing pneumonia (ie, bronchiolitis obliterans, cryptogenic organising pneumonia) or evidence of active pneumonitis on screening chest CT scan. History of radiation pneumonitis in the radiation field (fibrosis) is permitted
- Positive test for human immunodeficiency virus
- Patients with active hepatitis B (defined as having a positive hepatitis B surface antigen [HBsAg] test at screening) or hepatitis C
  - Patients with past hepatitis B virus (HBV) infection or resolved HBV infection (defined as having a negative HBsAg test and a positive antibody to hepatitis B core antigen [anti-HBc] antibody test) are eligible
  - Patients positive for hepatitis C virus (HCV) antibody are eligible only if polymerase chain reaction (PCR) is negative for HCV RNA
- Active tuberculosis
- Administration of a live, attenuated vaccine within 4 weeks prior to randomization or anticipation that such a live attenuated vaccine will be required during the study
- Patients with prior treatment with CD137 agonists, anti-CTLA-4, or therapies targeting the PD-L1 and PD-1 pathway are excluded
- Treatment with systemic immunostimulatory agents (including but not limited to interferons or interleukin-2) within 4 weeks or five half-lives of the drug, whichever is shorter, prior to randomisation

- Treatment with systemic corticosteroids or other systemic immunosuppressive medications (including but not limited to prednisone, dexamethasone, cyclophosphamide, azathioprine, methotrexate, thalidomide, and anti-tumour necrosis factor agents) within 2 weeks prior to randomisation, or anticipated requirement for systemic immunosuppressive medications during the trial
  - Patients who have received acute, low-dose, systemic immunosuppressant medications (eg, a one-time dose of dexamethasone for nausea) may be enrolled in the study after discussion with and approval by the Medical Monitor
  - The use of inhaled corticosteroids and mineralocorticoids (eg, fludrocortisone) is allowed. Low-dose supplemental corticosteroids for adrenocortical insufficiency are allowed

**Supplementary Table S1. PD-L1 scoring criteria on TC and IC using the SP142 assay**

| PD-L1 tumour cell scoring |                                      | PD-L1 tumour-infiltrating immune cell scoring |                                      |
|---------------------------|--------------------------------------|-----------------------------------------------|--------------------------------------|
| Score                     | Percentage of PD-L1-expressing cells | Score                                         | Percentage of PD-L1-expressing cells |
| TC3                       | ≥50%                                 | IC3                                           | ≥10%                                 |
| TC2                       | ≥5% and <50%                         | IC2                                           | ≥5% and <10%                         |
| TC1                       | ≥1% and <5%                          | IC1                                           | ≥1% and <5%                          |
| TC0                       | <1%                                  | IC0                                           | <1%                                  |

TC scored as percentage of tumour cells and IC scored as percentage of tumour area.

IC=tumour-infiltrating immune cell. PD-L1=programmed death-ligand 1. TC=tumour cell.

Reprinted from *The Lancet*, Fehrenbacher L, Spira A, Ballinger M, *et al.* 2016;387(10030):1837-1846,

Copyright 2016 Elsevier.

**Supplementary Table S2. Baseline characteristics of the TC3 or IC3 population**

| Characteristic                                                          | Atezolizumab<br>(n=72) | Docetaxel<br>(n=65) | Overall<br>(N=137) |
|-------------------------------------------------------------------------|------------------------|---------------------|--------------------|
| Age (years)                                                             |                        |                     |                    |
| Median                                                                  | 62.0                   | 67.0                | 64.0               |
| Range                                                                   | 39–82                  | 45–85               | 39–85              |
| Age ≥65 years                                                           | 28 (38.9)              | 40 (61.5)           | 68 (49.6)          |
| Sex                                                                     |                        |                     |                    |
| Male                                                                    | 50 (69.4)              | 38 (58.5)           | 88 (64.2)          |
| Female                                                                  | 22 (30.6)              | 27 (41.5)           | 49 (35.8)          |
| Race                                                                    |                        |                     |                    |
| White                                                                   | 57 (79.2)              | 49 (75.4)           | 106 (77.4)         |
| Asian                                                                   | 11 (15.3)              | 10 (15.4)           | 21 (15.3)          |
| Black                                                                   | 1 (1.4)                | 1 (1.5)             | 2 (1.5)            |
| Other*                                                                  | 1 (1.4)                | 3 (4.6)             | 4 (2.9)            |
| Unknown                                                                 | 2 (2.8)                | 2 (3.1)             | 4 (2.9)            |
| ECOG performance status                                                 |                        |                     |                    |
| 0                                                                       | 27 (37.5)              | 21 (32.3)           | 48 (35.0)          |
| 1                                                                       | 45 (62.5)              | 44 (67.7)           | 89 (65.0)          |
| Tobacco use history                                                     |                        |                     |                    |
| Never                                                                   | 10 (13.9)              | 11 (16.9)           | 21 (15.3)          |
| Current                                                                 | 15 (20.8)              | 12 (18.5)           | 27 (19.7)          |
| Previous                                                                | 47 (65.3)              | 42 (64.6)           | 89 (65.0)          |
| <i>EGFR</i> mutation                                                    |                        |                     |                    |
| Positive                                                                | 6 (8.3)                | 3 (4.6)             | 9 (6.6)            |
| Negative                                                                | 54 (75.0)              | 47 (72.3)           | 101 (73.7)         |
| Unknown                                                                 | 12 (16.7)              | 15 (23.1)           | 27 (19.7)          |
| <i>EMLA-ALK</i> translocation                                           |                        |                     |                    |
| Positive                                                                | 0                      | 0                   | 0                  |
| Negative                                                                | 39 (54.2)              | 32 (49.2)           | 71 (51.8)          |
| Unknown                                                                 | 33 (45.8)              | 33 (50.8)           | 66 (48.2)          |
| <i>KRAS</i> mutation                                                    |                        |                     |                    |
| Positive                                                                | 3 (4.2)                | 6 (9.2)             | 9 (6.6)            |
| Negative                                                                | 23 (31.9)              | 11 (16.9)           | 34 (24.8)          |
| Unknown                                                                 | 46 (63.9)              | 48 (73.8)           | 94 (68.6)          |
| Histology                                                               |                        |                     |                    |
| Nonsquamous                                                             | 49 (68.1)              | 47 (72.3)           | 96 (70.1)          |
| Squamous                                                                | 23 (31.9)              | 18 (27.7)           | 41 (29.9)          |
| Number of prior therapies in the locally advanced or metastatic setting |                        |                     |                    |
| 1                                                                       | 53 (73.6)              | 52 (80.0)           | 105 (76.6)         |

|   |           |           |           |
|---|-----------|-----------|-----------|
| 2 | 19 (26.4) | 13 (20.0) | 32 (23.4) |
|---|-----------|-----------|-----------|

Data are n (%), unless otherwise indicated. ECOG=Eastern Cooperative Oncology Group. EGFR=the gene encoding epidermal growth factor receptor. EMLA-ALK=the EMLA-anaplastic lymphoma kinase fusion gene. IC=tumour-infiltrating immune cell. KRAS=KRAS proto-oncogene. PD-L1=programmed death-ligand 1. TC=tumour cell. \*Other includes American Indian, Alaska Native, Hawaiian native, other Pacific Islander and other.

**Supplementary Table S3. Lung cancer treatments received after discontinuation of study treatment (intention-to-treat population)**

| Treatment                                         | Atezolizumab<br>n=425 | Docetaxel<br>n=425 |
|---------------------------------------------------|-----------------------|--------------------|
| <b>Total patients with at least one treatment</b> | 206 (48.5)            | 192 (45.2)         |
| <b>Chemotherapy</b>                               | 176 (41.4)            | 131 (30.8)         |
| Docetaxel                                         | 110 (25.9)            | 10 (2.4)           |
| Carboplatin                                       | 35 (8.2)              | 29 (6.8)           |
| Gemcitabine                                       | 24 (5.6)              | 38 (8.9)           |
| Vinorelbine                                       | 18 (4.2)              | 22 (5.2)           |
| Gemcitabine hydrochloride                         | 17 (4.0)              | 20 (4.7)           |
| Pemetrexed                                        | 15 (3.5)              | 22 (5.2)           |
| Vinorelbine tartrate                              | 15 (3.5)              | 22 (5.2)           |
| Paclitaxel                                        | 20 (4.7)              | 12 (2.8)           |
| Cisplatin                                         | 7 (1.6)               | 11 (2.6)           |
| Pemetrexed disodium                               | 7 (1.6)               | 8 (1.9)            |
| Paclitaxel albumin                                | 7 (1.6)               | 6 (1.4)            |
| Gimeracil/oteracil potassium/tegafur              | 7 (1.6)               | 5 (1.2)            |
| Irinotecan                                        | 6 (1.4)               | 6 (1.4)            |
| Etoposide                                         | 3 (0.7)               | 2 (0.5)            |
| Amrubicin                                         | 1 (0.2)               | 2 (0.5)            |
| Irinotecan hydrochloride                          | 2 (0.5)               | 1 (0.2)            |
| Methotrexate                                      | 0                     | 2 (0.5)            |
| Mitomycin                                         | 0                     | 2 (0.5)            |
| Amrubicin hydrochloride                           | 1 (0.2)               | 0                  |
| Cytarabine                                        | 0                     | 1 (0.2)            |
| Oxaliplatin                                       | 0                     | 1 (0.2)            |
| <b>Targeted therapy</b>                           | 63 (14.8)             | 66 (15.5)          |
| Erlotinib hydrochloride                           | 14 (3.3)              | 27 (6.4)           |
| Erlotinib                                         | 18 (4.2)              | 20 (4.7)           |
| Bevacizumab                                       | 9 (2.1)               | 9 (2.1)            |
| Afatinib                                          | 5 (1.2)               | 6 (1.4)            |
| Ramucirumab                                       | 6 (1.4)               | 1 (0.2)            |
| Osimertinib mesylate                              | 1 (0.2)               | 5 (1.2)            |
| Gefitinib                                         | 3 (0.7)               | 2 (0.5)            |
| Crizotinib                                        | 2 (0.5)               | 2 (0.5)            |
| Abemaciclib                                       | 2 (0.5)               | 1 (0.2)            |
| Osimertinib                                       | 2 (0.5)               | 1 (0.2)            |
| AUY922 (HSP90 inhibitor)                          | 0                     | 2 (0.5)            |
| Blinded patritumab                                | 1 (0.2)               | 1 (0.2)            |
| Ceritinib                                         | 2 (0.5)               | 0                  |
| Trastuzumab emtansine                             | 2 (0.5)               | 0                  |
| Aflibercept                                       | 1 (0.2)               | 0                  |
| BB1608 (cancer stem cell inhibitor)               | 1 (0.2)               | 0                  |
| BVD-523 (ERK inhibitor)                           | 1 (0.2)               | 0                  |
| Cabozantinib                                      | 1 (0.2)               | 0                  |
| Cetuximab                                         | 0                     | 1 (0.2)            |
| Lurbinectedin                                     | 1 (0.2)               | 0                  |
| Ranibizumab                                       | 1 (0.2)               | 0                  |
| Vemurafenib                                       | 1 (0.2)               | 0                  |
| Vorinostat                                        | 1 (0.2)               | 0                  |
| <b>Immunotherapy</b>                              | 19 (4.5)              | 73 (17.2)          |
| Nivolumab                                         | 16 (3.8)              | 58 (13.6)          |
| MEDI4736 (anti-PD-L1 monoclonal antibody)         | 0                     | 7 (1.6)            |
| L-DOS47 (anti-CEACAM6 AFAIKL2 immunconjugate)     | 2 (0.5)               | 3 (0.7)            |
| Lambrolizumab                                     | 0                     | 4 (0.9)            |
| Ipilimumab                                        | 0                     | 2 (0.5)            |
| Durvalumab                                        | 0                     | 1 (0.2)            |
| RO6958688 (T-cell bispecific monoclonal antibody) | 1 (0.2)               | 0                  |
| Tremelimumab                                      | 0                     | 1 (0.2)            |

Data are n (%), unless otherwise indicated. Patients were only counted once if they received more than one nonprotocol therapy of the same type. Patients were counted more than once if they received more than one type of the nonprotocol therapy. CEACAM6=carcinoembryonic antigen related cell adhesion molecule 6. ERK=extracellular signal-regulated kinase. HSP90=heat shock protein 90. PD-L1=programmed death-ligand 1.

**Supplementary Table S4. Objective response rate, and duration of response by PD-L1 status**

|                                       | <b>Atezolizumab</b>        | <b>Docetaxel</b> |
|---------------------------------------|----------------------------|------------------|
| <b>Objective response rate, n (%)</b> |                            |                  |
| TC3 or IC3                            | 22/72 (30.6)               | 7/65 (10.8)      |
| TC2/3 or IC2/3                        | 29/129 (22.5)              | 17/136 (12.5)    |
| TC1/2/3 or IC1/2/3                    | 43/241 (17.8)              | 36/222 (16.2)    |
| TC0 and IC0                           | 14/180 (7.8)               | 21/199 (10.6)    |
| <b>Duration of response</b>           |                            |                  |
| <b>TC3 or IC3</b>                     | <b>n=22</b>                | <b>n=7</b>       |
| Median (months)                       | 12.5                       | 6.3              |
| HR* (95% CI)<br>p value               | 0.62 (0.23–1.64)<br>0.3296 |                  |
| <b>TC2/3 or IC2/3</b>                 | <b>n=29</b>                | <b>n=17</b>      |
| Median (months)                       | 14.7                       | 9.2              |
| HR* (95% CI)<br>p value               | 0.48 (0.23–1.00)<br>0.0452 |                  |
| <b>TC1/2/3 or IC1/2/3</b>             | <b>n=43</b>                | <b>n=36</b>      |
| Median (months)                       | 16.0                       | 6.2              |
| HR* (95% CI)<br>p value               | 0.38 (0.22–0.65)<br>0.0003 |                  |
| <b>TC0 and IC0</b>                    | <b>n=14</b>                | <b>n=21</b>      |
| Median (months)                       | NE                         | 6.2              |
| HR* (95% CI)<br>p value               | 0.2 (0.07–0.63)<br>0.0026  |                  |

CI=confidence interval. HR=hazard ratio. IC=tumour-infiltrating immune cell. NE=not evaluable. PD-L1=programmed death-ligand 1. TC=tumour cell. \* Unstratified.

**Supplementary Table S5. Adverse events in at least 10% of patients in any arm**

| Adverse event         | Atezolizumab<br>n=609 |              | Docetaxel<br>n=578 |              |
|-----------------------|-----------------------|--------------|--------------------|--------------|
|                       | Any grade             | Grade 3 or 4 | Any grade          | Grade 3 or 4 |
| Fatigue               | 163 (26.8)            | 17 (2.8)     | 205 (35.5)         | 23 (4.0)     |
| Decreased appetite    | 143 (23.5)            | 2 (0.3)      | 136 (23.5)         | 9 (1.6)      |
| Cough                 | 141 (23.2)            | 2 (0.3)      | 105 (18.2)         | 1 (0.2)      |
| Nausea                | 108 (17.7)            | 4 (0.7)      | 131 (22.7)         | 2 (0.3)      |
| Diarrhoea             | 94 (15.4)             | 4 (0.7)      | 141 (24.4)         | 11 (1.9)     |
| Asthenia              | 116 (19.0)            | 8 (1.3)      | 114 (19.7)         | 13 (2.2)     |
| Dyspnoea              | 118 (19.4)            | 15 (2.5)     | 112 (19.4)         | 14 (2.4)     |
| Anaemia               | 70 (11.5)             | 14 (2.3)     | 136 (23.5)         | 33 (5.7)     |
| Alopecia              | 3 (0.5)               | 0            | 202 (34.9)         | 1 (0.2)      |
| Constipation          | 107 (17.6)            | 2 (0.3)      | 82 (14.2)          | 1 (0.2)      |
| Pyrexia               | 108 (17.7)            | 1 (0.2)      | 76 (13.1)          | 1 (0.2)      |
| Peripheral oedema     | 54 (8.9)              | 1 (0.2)      | 82 (14.2)          | 3 (0.5)      |
| Vomiting              | 74 (12.2)             | 2 (0.3)      | 62 (10.7)          | 4 (0.7)      |
| Arthralgia            | 73 (12.0)             | 3 (0.5)      | 58 (10.0)          | 1 (0.2)      |
| Myalgia               | 39 (6.4)              | 1 (0.2)      | 91 (15.7)          | 4 (0.7)      |
| Back pain             | 67 (11.0)             | 7 (1.1)      | 42 (7.3)           | 4 (0.7)      |
| Neutropenia           | 10 (1.6)              | 3 (0.5)      | 90 (15.6)          | 75 (13.0)    |
| Peripheral neuropathy | 24 (3.9)              | 0            | 65 (11.2)          | 7 (1.2)      |
| Musculoskeletal pain  | 64 (10.5)             | 4 (0.7)      | 25 (4.3)           | 1 (0.2)      |
| Stomatitis            | 19 (3.1)              | 1 (0.2)      | 63 (10.9)          | 11 (1.9)     |
| Dysgeusia             | 18 (3.0)              | 0            | 58 (10.0)          | 0            |
| Febrile neutropenia   | 1 (0.2)               | 1 (0.2)      | 62 (10.7)          | 62 (10.7)    |

Data are n (%), unless otherwise indicated.



**Supplementary Table S6. Predictive relationship of PD-L1 expression level for atezolizumab efficacy**

|                                                           |                                                   |
|-----------------------------------------------------------|---------------------------------------------------|
| <b>Endpoint: Overall survival*</b>                        | <b>Mutually exclusive PD-L1 expression levels</b> |
| <b>Treatment by PD-L1 expression interaction p-value*</b> | <b>0.0086</b>                                     |

**\*From Cox proportional hazard model with treatment, PD-L1 expression and treatment by PD-L1 expression interaction.**

The mutually exclusive PD-L1 expression levels include TC3 or IC3 (i.e.,  $\geq 50\%$  on TC or  $\geq 10\%$  on IC), TC2 or IC2 (i.e.,  $\geq 5\%$ - $< 50\%$  on TC or  $\geq 5\%$ - $< 10\%$  IC), TC1 or IC1 (i.e.,  $\geq 1\%$ - $< 5\%$  on TC or IC), TC0 and IC0 (i.e.,  $< 1\%$  on TC and IC).

IC=tumour-infiltrating immune cell PD-L1=programmed death-ligand 1. TC=tumour cell.

### **Supplementary Figure S1. Progression-free survival in the ITT and PD-L1 subgroups**

Kaplan-Meier estimates in the ITT primary population, stratified according to PD-L1 expression on IC (IC0, IC1, IC2, and IC3), the number of prior chemotherapy regimens (1 vs 2), and histology (nonsquamous vs squamous) (A). Kaplan-Meier estimates in the TC1/2/3 or IC1/2/3 group using the same strata (B). Kaplan-Meier estimates in the TC2/3 or IC2/3 group (unstratified) (C). Kaplan-Meier estimates in the TC3 or IC3 group (unstratified) (D). Kaplan-Meier estimates in the TC0 and IC0 group (unstratified) (E).

Patients not reported as having progressed or died at the time of analysis were censored at the date of the last tumour assessment. Patients without post-baseline information were censored at the randomisation date plus 1 day.

CI, confidence interval. HR=hazard ratio. IC=tumour-infiltrating immune cell. ITT=intention-to-treat. PD-L1=programmed death-ligand 1. TC=tumour cell.

**A**  
**ITT**

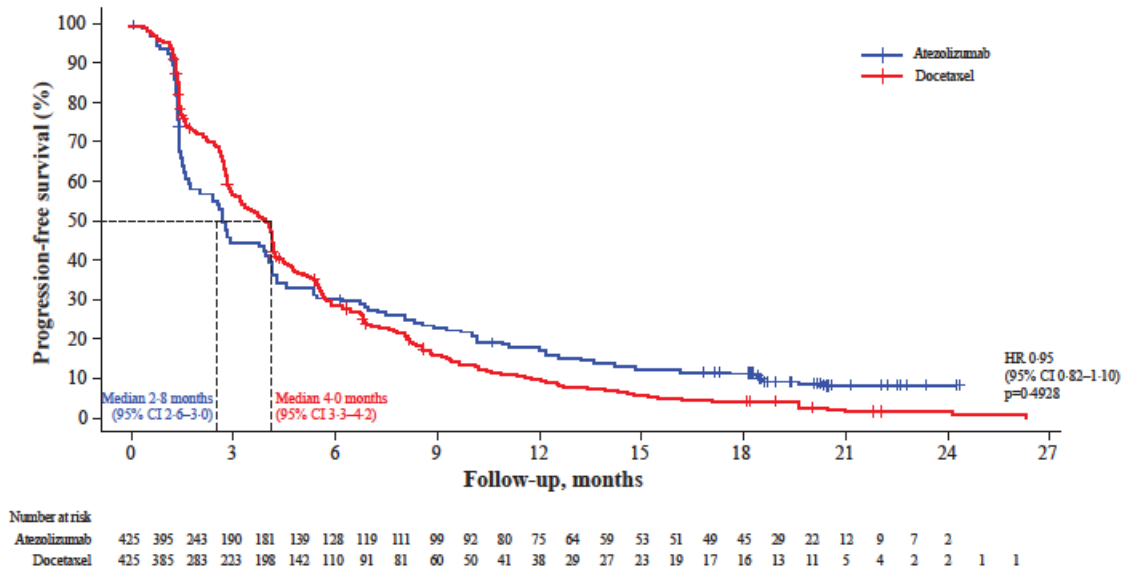

**B**  
**TC1/2/3 or IC1/2/3**

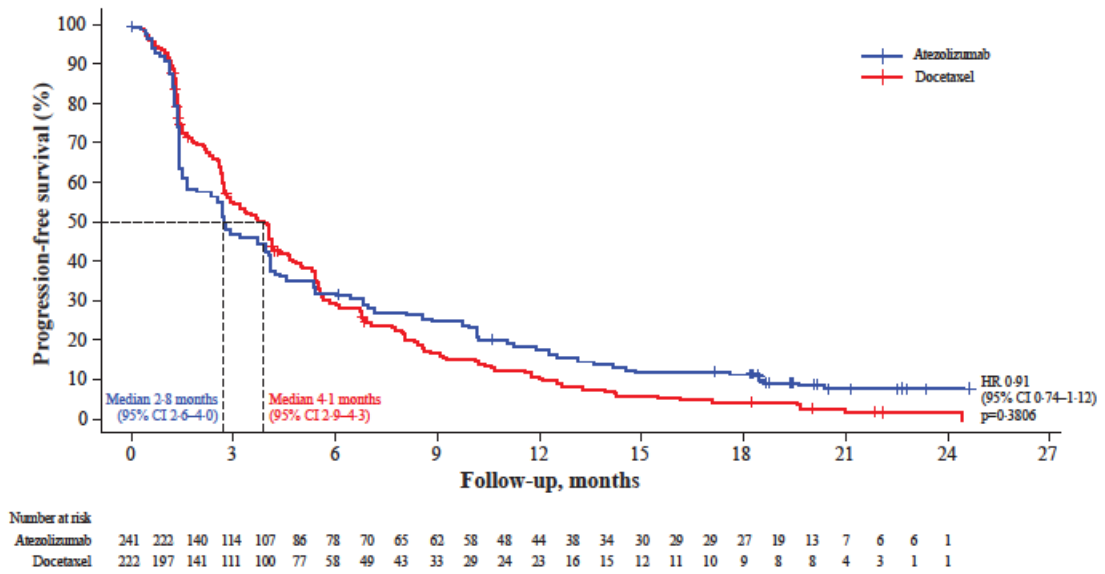

**C**  
TC2/3 or IC2/3

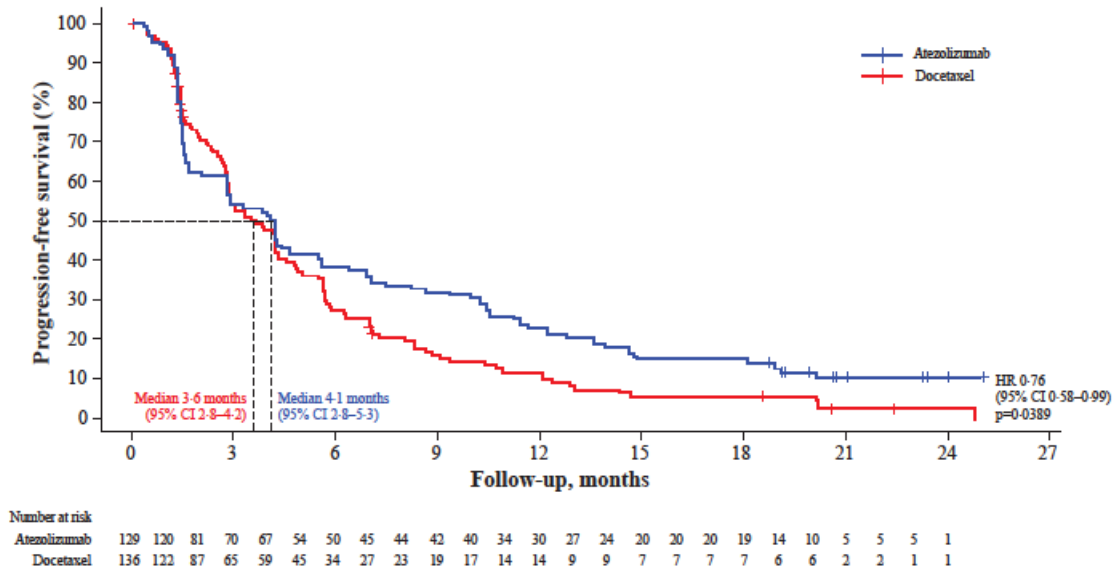

**D**  
TC3 or IC3

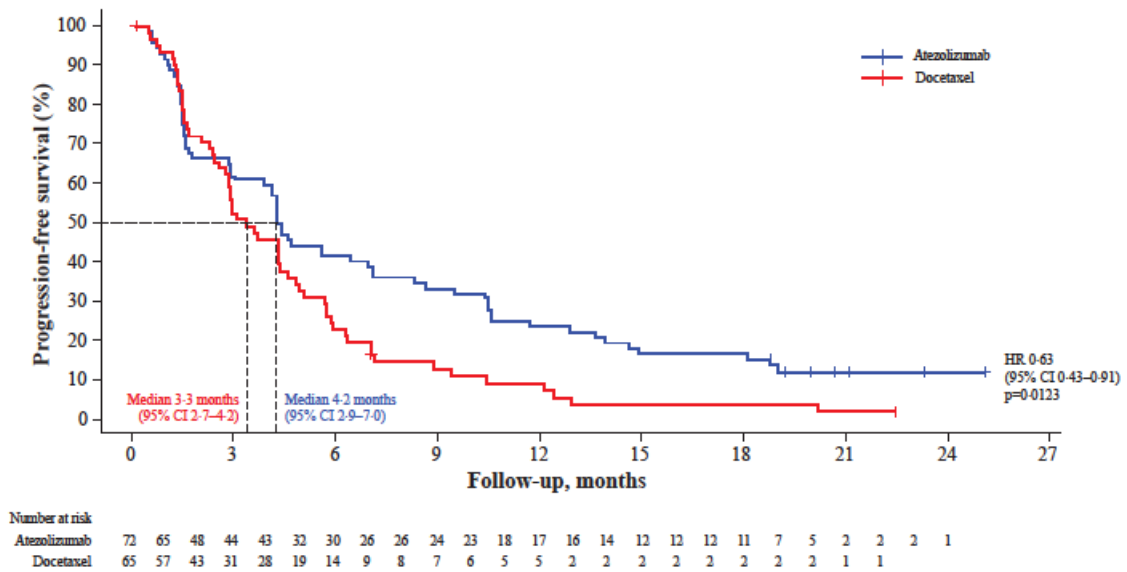

**E**  
**TC0 and IC0**

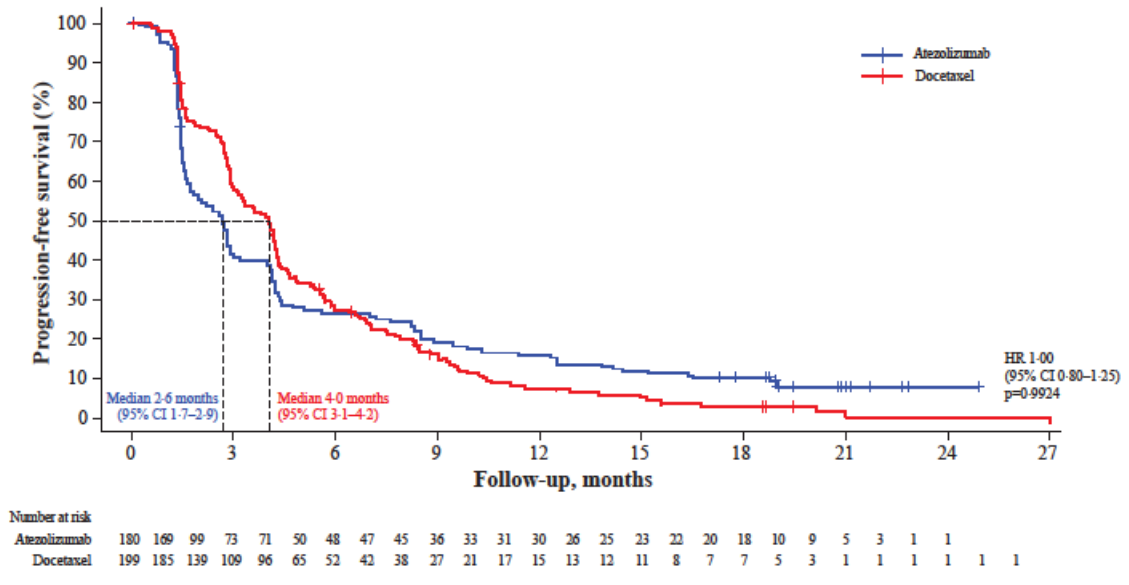

**Supplementary Figure 2. Overall survival by *PD-L1* gene expression**

Median overall survival was estimated using the Kaplan-Meier method, unstratified for subgroups. HRs and 95% CIs for overall survival in subgroups defined by gene expression  
CI, confidence interval. HR=hazard ratioITT=intention-to-treat. PD-L1=programmed death-ligand 1.

|                                            | n (%)     | HR   | 95% CI    | Median overall survival (months) |           |
|--------------------------------------------|-----------|------|-----------|----------------------------------|-----------|
|                                            |           |      |           | Atezolizumab                     | Docetaxel |
| <i>PD-L1</i> gene expression $\geq$ median | 356 (50)  | 0.68 | 0.52–0.89 | 16.3                             | 11.3      |
| <i>PD-L1</i> gene expression < median      | 355 (50)  | 0.74 | 0.58–0.96 | 12.7                             | 8.7       |
| Biomarker evaluable population             | 711 (100) | 0.69 | 0.57–0.83 | 14.2                             | 9.5       |

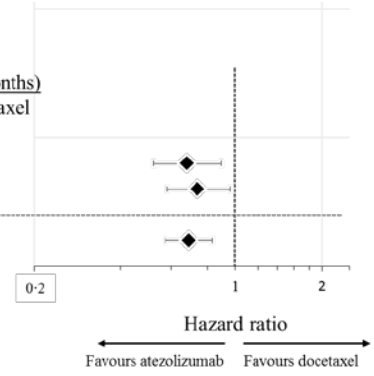

Supplement: NIHMS1060372-supplement-Supplement.pdf [file NIHMS1060372-supplement-Supplement.pdf]
